# Supplementary material for: Genome-wide genetic characterization and selection signatures in Anatolian Merino sheep
Source: Copernicus journal article supplement (doi:10.5194/aab-68-161-2025), 2025-02-26
Supplement: Supplementary file 1 [file aab-68-161-2025-supplement.zip]

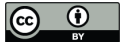

*Supplement of*

## **Genome-wide genetic characterization and selection signatures in Anatolian Merino sheep**

**Taki Karsli**

*Correspondence to:* Taki Karsli (takikarsli@ogu.edu.tr)

- aab-68-161-2025-supplement-title-page.pdf
- Supplementary\_File.xlsx

The copyright of individual parts of the supplement might differ from the article licence.
