# Supplementary material for: Genome-wide genetic characterization and selection signatures in Anatolian Merino sheep
Source: Copernicus journal article supplement (doi:10.5194/aab-68-161-2025), 2025-02-26
Supplement: Supplementary file 1 [file aab-68-161-2025-supplement.zip]

## Sheet: Sheet1
Supplementary File. An overview of genes detected to be under selection pressure via ROH and İHS approaches and their effects on phenotype
Statistical approach	Chromosome	Start position	End position	Number of SNPs	Overlapped Gene(s)	QTL-related SNPs	Effect(s) on phenotype
ROH	1	69426959	69955782	47	BTBD8, C1orf146, GLMN, RPAP2, GFI1, and EVI5	-	-
		147050610	147697339	44	ROBO1	1	Milk content
	2	123449656	123649656	1	FSIP2	2	Milk content
		144700000	144900000	13	COBLL1	2	Milk content
		228388520	228906149	26	-	-	-
	4	45055806	45688956	40	PTPN12, GSAP, CCDC146, FGL2, FAM185A, and FBXL13	1	Milk content
	6	24165408	28492148	33	EMCN, DDIT4L, H2AZ1, and DNAJB14	12	Milk and meat content
		50661784	51119114	36	PCDH7	2	Total muscle area
		78505633	78861838	19	-	-	-
	7	52128566	52336285	18	TEX9	-	-
	9	67702674	68260470	48	SYBU, EBAG9, PKHD1L1, ENY2, NUDCD1, and TRHR	4	Udder morphology and immunoglobulin A level
	13	49988007	50696483	50	HAO1, ADRA1D, and SMOX	-	-
	15	832337	1474604	53	IZUMO1R, GPR83, MRE11, ANKRD49, AASDHPPT, KBTBD3, and MSANTD4	-	-
		11087170	11894037	36	-	-	-
iHS	1	1727577	1927577	1	-	-	-
		13249271	13449271	1	-	-	-
		97866779	98966779	3	-	-	-
		120822896	121022896	3	-	-	-
		132964284	133164284	1	-	-	-
		274141838	274341838	2	GALNT15, DPH3, and OXNAD1	-	-
		276713628	276913628	1	-	-	-
	2	21516803	21716803	1	GRIN3A, RNF20, PGAP4, and ALDOB	-	-
		42489397	42712910	3	LOXL2, R3HCC1, CHMP7, RHOBTB2, and PEBP4	2	Milk content
		80120541	80320541	1	-	-	-
		112853413	113053413	2	LGSN	12	Fecal egg count and milk bacterial count
		229788573	229988573	8	SCYGR4	-	-
		249802628	250002628	3	-	-	-
	3	106486419	106752647	3	-	-	-
		114844778	115044814	2	SYT1	1	Udder morphology
		207619485	207819485	2	-	-	-
		220986132	220786132	1	-	-	-
	4	112182774	112382774	1	CNTNAP2	-	-
	5	0	200000	2	-	-	-
		695108	895108	2	GFPT2, MAPK9, and RASGEF1C	1	Udder morphology
		106531839	106731839	1	-	-	-
	6	45218	245218	1	-	-	-
		114598061	114798061	1	SORCS2	-	-
	7	0	200000	2	-	-	-
		22742421	23725524	3	-	-	-
		97804252	98004252	1	GPR65 and KCNK10	-	-
	8	74048143	74248143	1	PCMT1	-	-
	9	90003607	90203607	2	CA1	-	-
	10	0	200000	4	-	-	-
		25027504	25227504	1	RFXAP and SERTM1	2	Immunoglobulin A level
		70668697	71564909	14	-	-	-
		76389999	76589999	8	PCCA, GGACT, and TMTC4	-	-
	11	688188	888188	5	-	-	-
		15763651	15963651	2	-	-	-
		56934544	57134544	3	SDK2	2	Bone density
	12	2324018	2524018	5	NFASC	-	-
		46587236	46787236	1	KCNAB and NPHP4	-	-
	13	0	200000	1	-	-	-
		27500014	27700014	20	BEND7, PRPF18, and FRMD4A	2	Immunoglobulin A level
	14	4668533	4868533	3	VAT1L, CLEC3A, and WWOX	-	-
		6814928	7014928	2	DYNLRB2 and CDYL2	-	-
		7813487	8013487	2	PLCG2	-	-
		11412707	11612707	1	-	-	-
	15	10935373	11135373	1	-	-	-
		33747332	33947332	5	GRAMD1B	3	Immunoglobulin A level
	16	70319488	70519488	2	-	-	-
	17	5953716	6153716	1	-	-	-
		58880256	59080256	2	MED13L	-	-
		70959108	71159108	8	-	-	-
	18	161061	361061	9	-	-	-
		3808568	3908568	1	GABRG3	-	-
		5047293	5247293	1	ALDH1A3	-	-
		11825487	12025487	1	MCTP2	-	-
		16140540	16340540	1	AGBL1	-	-
		22690846	22890846	1	-	-	-
	19	0	200000	3	-	-	-
		17450283	17650283	4	SRGAP3 and RAD18	2	Milk content
		32074275	32274275	2	FRMD4B	-	-
		58769684	58969684	2	IQSEC1, ACAD9, CFAP92, GP9, RAB43, and ISY1	-	-
	20	0	200000	35	-	-	-
		18811833	19011833	1	RUNX2	2	Somatic cell score
		26850041	27050041	2	-	-	-
	21	0	200000	1	PANX1	-	-
		35365624	35565624	9	PAG9	-	-
		44821211	45021211	4	OSBPL5, CARS1, and NAP1L4	-	-
	22	0	200000	2	-	-	-
		6000148	6200148	2	MBL2	7	Carcass traits
		28190133	28390133	1	-	-	-
		48251919	48451919	1	-	-	-
	23	36264	236264	14	-	-	-
		26745557	26945557	1	-	-	-
		38112265	38312265	1	DLGAP1	3	Milk content and susceptibility to Maedi-Visna virus
		46363274	46563274	4	C23H18orf25, ARK2C, and LOXHD1	3	Milk yield and immunoglobulin A level
		56317882	56517882	1	WDR7	-	-
	24	275311	475311	5	-	-	-
		15529925	15729925	1	-	-	-
		35228153	35428153	1	CUX1	-	-
		39993133	40193133	1	SDK1	-	-
	26	3633999	3833999	1	SCMD1	-	-
